# Supplementary material for: Improved power output by incorporating polyvinyl alcohol into the anode of a microbial fuel cell
Source: Royal Society of Chemistry journal article supplement (doi:10.1039/c5ta03318g), 2015-01-01
Supplement: c5ta03318g1.pdf [file c5ta03318g1.pdf]

**Supplementary information**

**Improved power output by polyvinyl alcohol in the anode of  
microbial fuel cell**

**X. F. Chen<sup>a</sup>, X. S. Wang<sup>a</sup>, K. T. Liao<sup>a</sup>, L. Z. Zeng<sup>c</sup>, L. D. Xing<sup>a,b</sup>, X. W. Zhou<sup>a</sup>, X. W. Zheng<sup>a</sup>, W. S. Li<sup>a,b\*</sup>**

<sup>a</sup> School of Chemistry and Environment, South China Normal University, Guangzhou 510006, China

<sup>b</sup> Engineering Research Center of MTEES (Ministry of Education), Research Center of BMET (Guangdong Province), Engineering Lab. of OFMHEB (Guangdong Province), Key Lab. of ETESPG (GHEI), and Innovative Platform for ITBMD (Guangzhou Municipality), South China Normal University, Guangzhou 510006, China.

<sup>c</sup> Research Resources Center, South China Normal University, Guangzhou 510006, China

Tel: +8620 39310256; E-mail: [liwsh@scnu.edu.cn](mailto:liwsh@scnu.edu.cn)

Figure captions

Fig. S1. Power outputs of cube MFCs through loading with different anode materials.

Fig. S2. Schematic configuration of single-cube microbial fuel cell.

Fig. S3. Contact angles of water droplets on binder films

Fig. S4. Optimized structures of simplified glucose (A) and O-polysaccharide (B), and The Oxygen Atomic Charges (q/e) of glucose (A) and O-polysaccharides (B) fit by CHELPG method.

Fig. S5. Power outputs of cube MFCs through loading with different output resistances.

Fig. S6. Power outputs of cube MFCs inoculated with the supernatant of acclimated sludge from methane-generating pond.

Table S1 Calculated hydrogen bond length and binding energy between simplified units of binder and bacterium membrane.

Table S2 The associated Atomic Charges (q/e) of D-glucose and polysaccharides fit by CHELPG method.

---

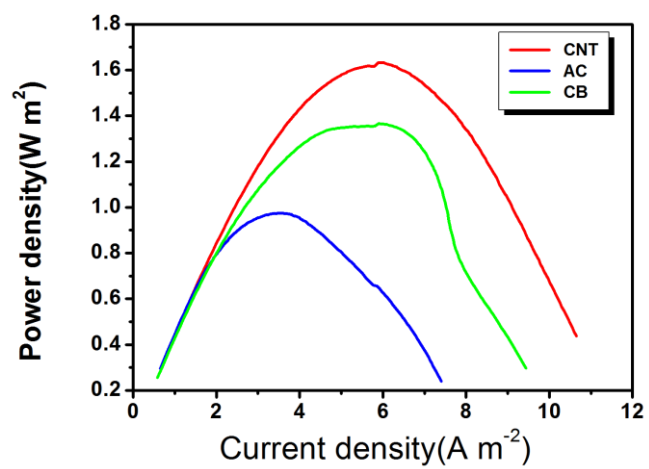

Fig. S1. Power outputs of cube MFCs through loading with different anode materials (AC: activated carbon, CB: carbon black).

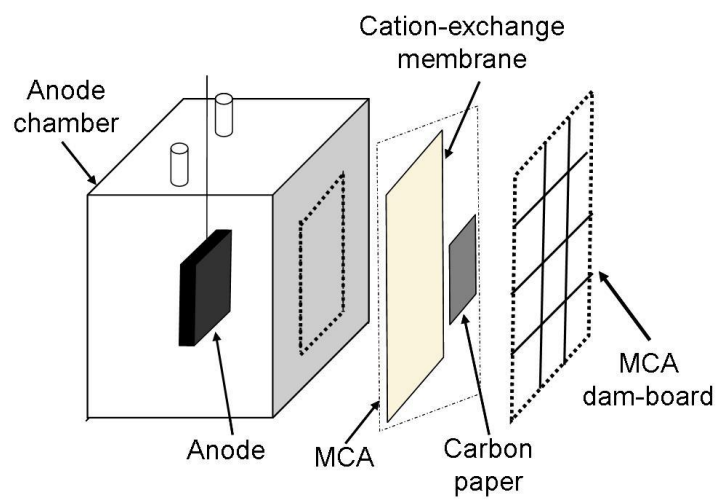

Fig. S2. Schematic configuration of single-cube microbial fuel cell.

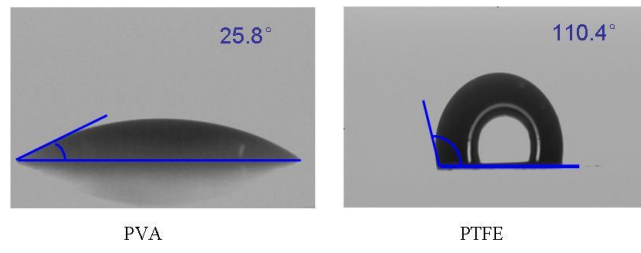

Fig. S3. Contact angles of water droplets on binder films

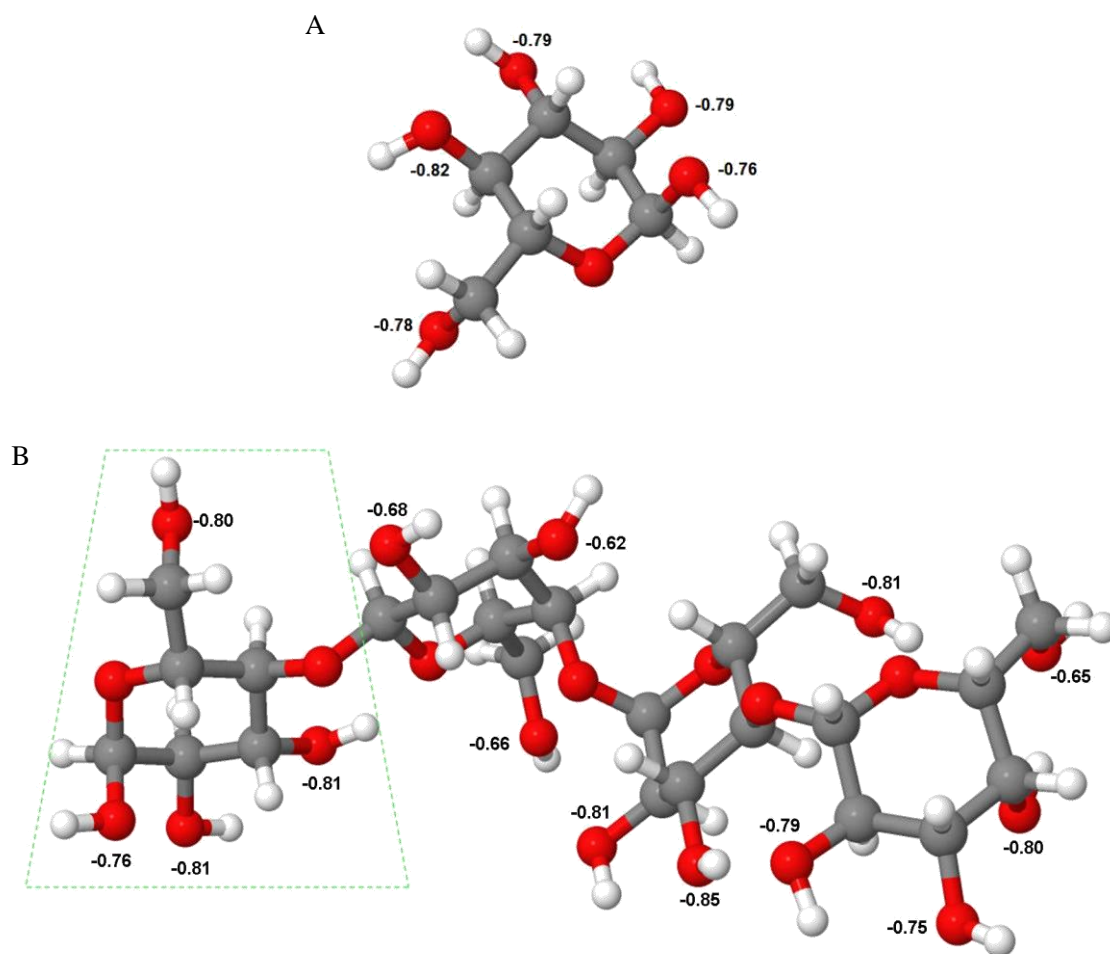

Fig. S4. Optimized structures and charge (q/e) on oxygen atoms of glucose (A) and O-polysaccharide (B) fit by CHELPG method

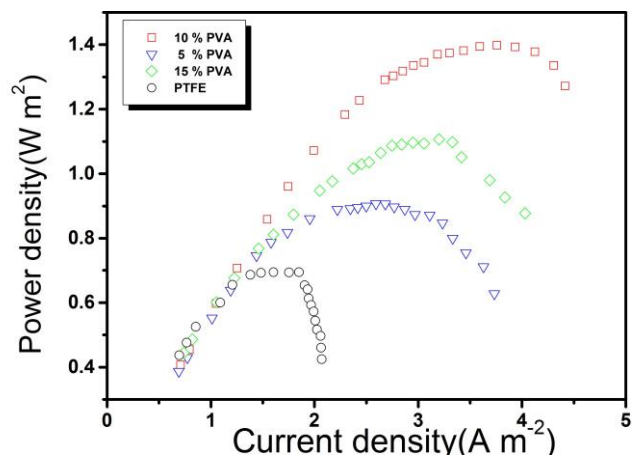

Fig. S5. Power outputs of cube MFCs through loading with different output resistances.

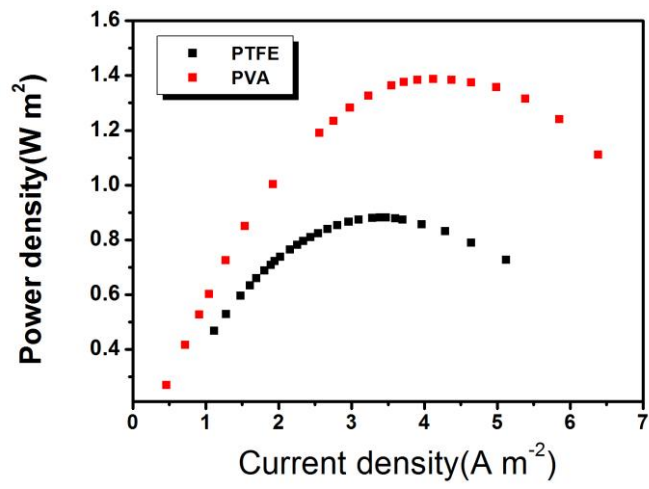

Fig. S6. Power outputs of cube MFCs inoculated with the supernatant of acclimated sludge from methane-generating pond.

Table S1 Calculated hydrogen bond length and binding energy between simplified units of binder and bacterium membrane.

| Units                                                                               | Hydrogen bond length (Å) | Interaction energy (KJ/mol) |
|-------------------------------------------------------------------------------------|--------------------------|-----------------------------|
| 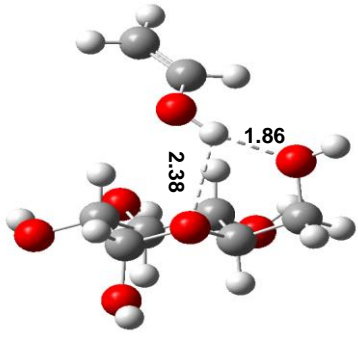   | 2.38<br>1.86             | -46.47                      |
|   | 2.69<br>1.79             | -48.43                      |
|  | 1.92<br>2.23             | -47.54                      |
|  | 1.78                     | -34.91                      |



|                                                                                     |      |        |
|-------------------------------------------------------------------------------------|------|--------|
| 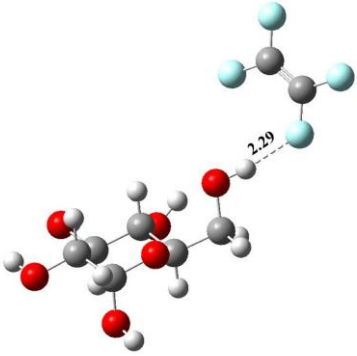   | 2.29 | -18.09 |
|    | 2.36 | -15.89 |
|  | 2.62 | -15.40 |
|  | 2.53 | -15.59 |

Table S2 The associated Atomic Charges (q/e) of D-glucose and polysaccharides fit by CHELPG method

| Molecule         | O <sub>2</sub> | O <sub>3</sub> | O <sub>4</sub> | O <sub>6</sub> |
|------------------|----------------|----------------|----------------|----------------|
| glucose          | -0.76          | -0.79          | -0.79          | -0.78          |
| O-polysaccharide | -0.76          | -0.81          | -0.81          | -0.80          |
